# Supplementary material
Source: publisher site journal article supplement (https://www.dovepress.com/get_supplementary_file.php?f=450257.docx)
Supplement: Supplementary file 1 [file get_supplementary_file.php]

# Supplementary Materials

Supplementary Table S1: PRISMA 2020 Checklist.Supplementary Table S2: Full search strategy for each of the electronic databases. The detailed search strategies of 8 databases were displayed, including 4 Englinsh databases (Pubmed, Embase, Web of Science, and the Cochrane Library) and 4 Chinese databases (China National Knowledge Infrastructure, Wanfang Data, Chongqing VIP, Chinese Biomedical Literature Database).Supplementary Table S3: Quality of the evidence based on GRADE.Supplementary Figure S1, S2: Risk of bias in ROB 2.Supplementary Figure S3-S9: Sensitivity analysis results.

## Supplementary Table S1: PRISMA 2020 Checklist.

| Section and Topic | Item # | Checklist item | Location where item is reported |
| --- | --- | --- | --- |
| TITLE | | |  |
| Title | 1 | Identify the report as a systematic review. | Page 1 |
| ABSTRACT | | |  |
| Abstract | 2 | See the PRISMA 2020 for Abstracts checklist. | Page 1 |
| INTRODUCTION | | |  |
| Rationale | 3 | Describe the rationale for the review in the context of existing knowledge. | Page 2-4 |
| Objectives | 4 | Provide an explicit statement of the objective(s) or question(s) the review addresses. | Page 4 |
| METHODS | | |  |
| Eligibility criteria | 5 | Specify the inclusion and exclusion criteria for the review and how studies were grouped for the syntheses. | Page 4-5 |
| Information sources | 6 | Specify all databases, registers, websites, organisations, reference lists and other sources searched or consulted to identify studies. Specify the date when each source was last searched or consulted. | Page 4 |
| Search strategy | 7 | Present the full search strategies for all databases, registers and websites, including any filters and limits used. | Page 5 |
| Selection process | 8 | Specify the methods used to decide whether a study met the inclusion criteria of the review, including how many reviewers screened each record and each report retrieved, whether they worked independently, and if applicable, details of automation tools used in the process. | Page 6 |
| Data collection process | 9 | Specify the methods used to collect data from reports, including how many reviewers collected data from each report, whether they worked independently, any processes for obtaining or confirming data from study investigators, and if applicable, details of automation tools used in the process. | Page 6 |
| Data items | 10a | List and define all outcomes for which data were sought. Specify whether all results that were compatible with each outcome domain in each study were sought (e.g. for all measures, time points, analyses), and if not, the methods used to decide which results to collect. | Page 5-6 |
| 10b | List and define all other variables for which data were sought (e.g. participant and intervention characteristics, funding sources). Describe any assumptions made about any missing or unclear information. | Page 5-6 |
| Study risk of bias assessment | 11 | Specify the methods used to assess risk of bias in the included studies, including details of the tool(s) used, how many reviewers assessed each study and whether they worked independently, and if applicable, details of automation tools used in the process. | Page 6 |
| Effect measures | 12 | Specify for each outcome the effect measure(s) (e.g. risk ratio, mean difference) used in the synthesis or presentation of results. | Page 7 |
| Synthesis methods | 13a | Describe the processes used to decide which studies were eligible for each synthesis (e.g. tabulating the study intervention characteristics and comparing against the planned groups for each synthesis (item #5)). | Page 7 |
| 13b | Describe any methods required to prepare the data for presentation or synthesis, such as handling of missing summary statistics, or data conversions. | Page 7 |
| 13c | Describe any methods used to tabulate or visually display results of individual studies and syntheses. | Page 7 |
| 13d | Describe any methods used to synthesize results and provide a rationale for the choice(s). If meta-analysis was performed, describe the model(s), method(s) to identify the presence and extent of statistical heterogeneity, and software package(s) used. | Page 7 |
| 13e | Describe any methods used to explore possible causes of heterogeneity among study results (e.g. subgroup analysis, meta-regression). | Page 7 |
| 13f | Describe any sensitivity analyses conducted to assess robustness of the synthesized results. | Page 7 |
| Reporting bias assessment | 14 | Describe any methods used to assess risk of bias due to missing results in a synthesis (arising from reporting biases). | Page 6 |
| Certainty assessment | 15 | Describe any methods used to assess certainty (or confidence) in the body of evidence for an outcome. | Page 7 |
| RESULTS | | |  |
| Study selection | 16a | Describe the results of the search and selection process, from the number of records identified in the search to the number of studies included in the review, ideally using a flow diagram. | Page 8 |
| 16b | Cite studies that might appear to meet the inclusion criteria, but which were excluded, and explain why they were excluded. | Page 8 |
| Study characteristics | 17 | Cite each included study and present its characteristics. | Page 8 |
| Risk of bias in studies | 18 | Present assessments of risk of bias for each included study. | Page 9 |
| Results of individual studies | 19 | For all outcomes, present, for each study: (a) summary statistics for each group (where appropriate) and (b) an effect estimate and its precision (e.g. confidence/credible interval), ideally using structured tables or plots. | Page 9-12 |
| Results of syntheses | 20a | For each synthesis, briefly summarise the characteristics and risk of bias among contributing studies. | Page 9-12 |
| 20b | Present results of all statistical syntheses conducted. If meta-analysis was done, present for each the summary estimate and its precision (e.g. confidence/credible interval) and measures of statistical heterogeneity. If comparing groups, describe the direction of the effect. | Page 9-12 |
| 20c | Present results of all investigations of possible causes of heterogeneity among study results. | Page 9-12 |
| 20d | Present results of all sensitivity analyses conducted to assess the robustness of the synthesized results. | Page 9-12 |
| Reporting biases | 21 | Present assessments of risk of bias due to missing results (arising from reporting biases) for each synthesis assessed. | Page 9 |
| Certainty of evidence | 22 | Present assessments of certainty (or confidence) in the body of evidence for each outcome assessed. | Page 9 |
| DISCUSSION | | |  |
| Discussion | 23a | Provide a general interpretation of the results in the context of other evidence. | Page 13-16 |
| 23b | Discuss any limitations of the evidence included in the review. | Page 13-16 |
| 23c | Discuss any limitations of the review processes used. | Page 16 |
| 23d | Discuss implications of the results for practice, policy, and future research. | Page 16 |
| OTHER INFORMATION | | |  |
| Registration and protocol | 24a | Provide registration information for the review, including register name and registration number, or state that the review was not registered. | Page 4 |
| 24b | Indicate where the review protocol can be accessed, or state that a protocol was not prepared. | NA |
| 24c | Describe and explain any amendments to information provided at registration or in the protocol. | NA |
| Support | 25 | Describe sources of financial or non-financial support for the review, and the role of the funders or sponsors in the review. | Page 17 |
| Competing interests | 26 | Declare any competing interests of review authors. | Page 17 |
| Availability of data, code and other materials | 27 | Report which of the following are publicly available and where they can be found: template data collection forms; data extracted from included studies; data used for all analyses; analytic code; any other materials used in the review. | Page 17 |

## Supplementary Table S2: Full search strategy for each of the electronic databases.

| Databases | Searches | Hits |
| --- | --- | --- |
| PubMed Database | #1. pulmonary disease chronic obstructive[Mesh]  #2. "chronic obstructive lung disease"[Title/Abstract] OR "chronic obstructive pulmonary diseases"[Title/Abstract] OR "COAD"[Title/Abstract] OR "COPD"[Title/Abstract] OR "chronic obstructive airway disease"[Title/Abstract] OR "chronic obstructive pulmonary disease"[Title/Abstract] OR "airflow obstruction chronic"[Title/Abstract] OR "airflow obstructions chronic"[Title/Abstract] OR "chronic airflow obstructions"[Title/Abstract] OR "chronic airflow obstruction"[Title/Abstract]  #3. #1 OR #2  #4. "hospitalization"[Title/Abstract] OR "rehospitalization"[Title/Abstract] OR "exacerbation"[Title/Abstract] OR "aggravation"[Title/Abstract] OR "Flare"[Title/Abstract] OR "admission"[Title/Abstract] OR "readmission"[Title/Abstract] OR "readmitted"[Title/Abstract]  #5. #3 AND #4  #6. "acupuncture therapy"[Mesh]  #7. "acupuncture"[Title/Abstract] OR "acupuncture treatment"[Title/Abstract] OR "acupuncture treatments"[Title/Abstract] OR "treatment acupuncture"[Title/Abstract] OR "therapy acupuncture"[Title/Abstract] OR "electroacupuncture"[Title/Abstract] OR "electro-acupuncture"[Title/Abstract] OR "body acupuncture"[Title/Abstract] OR "manual acupuncture"[Title/Abstract]  #8. #6 OR #7  #9. #5 AND #8 | 27 |
| Web of Science | #1. TS = (pulmonary disease, chronic obstructive OR chronic obstructive lung disease OR chronic obstructive pulmonary diseases OR COAD OR COPD OR chronic obstructive airway disease OR chronic obstructive pulmonary disease OR airflow obstruction, chronic OR airflow obstructions, chronic OR chronic airflow obstructions OR chronic airflow obstruction)  #2. TS = (hospitalization OR rehospitalization OR exacerbation OR aggravation OR flare OR admission OR readmission OR readmitted)  #3. TS = (acupuncture OR acupuncture treatment OR acupuncture treatments OR Treatment, acupuncture OR therapy, acupuncture OR electroacupuncture OR electro-acupuncture OR body acupuncture OR manual acupuncture)  #4. #1 AND #2 AND #3 | 41 |
| EMBASE Database | #1. 'chronic obstructive lung disease'/dm  #2. 'hospitalization' OR 'disease exacerbation' OR 'admission' OR 'hospital readmission'  #3. 'acupuncture therapy'/exp OR 'acupuncture therapy' OR 'acupuncture'/exp OR 'acupuncture' OR 'electroacupuncture'/exp OR 'electroacupuncture'  #4. #1 AND #2 AND #3 AND [article]/lim | 12 |
| Cochrane Database | #1. MeSH descriptor: [Pulmonary Disease, Chronic Obstructive] explode all trees  #2. (Chronic Obstructive Lung Disease OR Chronic Obstructive Pulmonary Diseases OR COAD OR COPD OR Chronic Obstructive Airway Disease OR Chronic Obstructive Pulmonary Disease OR Airflow Obstruction, Chronic OR Airflow Obstructions, Chronic OR Chronic Airflow Obstructions OR Chronic Airflow Obstruction):ti,ab,kw  #3. #1 OR #2  #4. Hospitalization OR Rehospitalization OR Exacerbation OR Aggravation OR Flare OR Admission OR Readmission OR Readmitted  #5. #3 AND #4  #6. MeSH descriptor: [Acupuncture] explode all trees  #7. MeSH descriptor: [Acupuncture Therapy] explode all trees  #8. MeSH descriptor: [Electroacupuncture] explode all trees  #9. (Acupuncture OR Acupuncture Treatment OR Acupuncture Treatments OR Treatment, Acupuncture OR Therapy, Acupuncture OR Electroacupuncture OR Electro-Acupuncture OR Body Acupuncture OR Manual Acupuncture):ti,ab,kw  #10. #6 OR #7 OR #8 OR #9  #11. MeSH descriptor: [Random Allocation] explode all trees  #12. MeSH descriptor: [Randomized Controlled Trial] explode all trees  #13. MeSH descriptor: [Randomized Controlled Trials as Topic] explode all trees  #14. (Controlled Clinical Trial OR Clinical Trials, Randomized OR Trials, Randomized Clinical OR Controlled Clinical Trials, Randomized OR Clinical Trials as Topic OR Random OR Random Allocation OR Allocation, Random OR Randomization):ti,ab,kw  #15. #11 OR #12 OR #13 OR #14  #16. #5 AND #10 AND #15 | 22 |
| China National Knowledge Infrastructure (CNKI, Chinese Database)  中国知网 | SU=（慢阻肺急性加重+慢性阻塞性肺病急性加重+慢性阻塞性肺疾病急性加重+慢阻肺急性发作+慢性阻塞性肺病急性发作+慢性阻塞性肺疾病急性发作+AECOPD+COPD急性加重+COPD急性发作）AND SU=(针刺+针灸+电针+温针灸+毫针）AND TKA=（随机+对照+临床+RCT） | 63 |
| Chinese Biomedical Literature Database  (CBM, Chinese Database)  中国生物医学文献数据库 | ( "慢性阻塞肺疾病"[核心字段:智能] OR "COAD"[核心字段:智能] OR "慢性气道阻塞性疾病"[核心字段:智能] OR "慢性阻塞性肺疾病"[核心字段:智能] OR "慢性气流阻塞"[核心字段:智能] OR "慢性气道阻塞"[核心字段:智能] OR "气道阻塞, 慢性"[核心字段:智能] OR "COPD"[核心字段:智能]) AND( "急性加重期"[核心字段:智能] OR "急性发作期"[核心字段:智能] OR "急性发作"[核心字段:智能] OR "急性加重"[核心字段:智能]) AND( "针刺"[核心字段:智能] OR "针刺疗法"[核心字段:智能] OR "针灸疗法"[核心字段:智能] OR "温针疗法"[核心字段:智能] OR "电针"[核心字段:智能] OR "电针疗法"[核心字段:智能] OR "毫针"[核心字段:智能] OR "毫针疗法"[核心字段:智能]) AND( "随机"[摘要:智能] OR "对照"[摘要:智能] OR "临床"[摘要:智能] OR "RCT"[摘要:智能]) | 183 |
| Chongqing VIP Database  (VIP, Chinese Database)  重庆维普 | T=（慢阻肺急性加重 OR 慢性阻塞性肺病急性加重 OR 慢性阻塞性肺疾病急性加重 OR 慢阻肺急性发作 OR 慢性阻塞性肺病急性发作 OR 慢性阻塞性肺疾病急性发作 OR AECOPD OR COPD急性加重 OR COPD急性发作）AND T= (针刺 OR 针灸 OR 电针 OR 温针灸 OR 毫针）AND R=（随机 OR 对照 OR 临床 OR RCT） | 127 |
| Wanfang Database  (WF, Chinese Database)  万方数据库 | 主题：（慢阻肺急性加重 OR 慢性阻塞性肺病急性加重 OR 慢性阻塞性肺疾病急性加重 OR 慢阻肺急性发作 OR 慢性阻塞性肺病急性发作 OR 慢性阻塞性肺疾病急性发作 OR AECOPD OR COPD急性加重 OR COPD急性发作）AND 主题：（针刺 OR 针灸 OR 电针 OR 温针灸 OR 毫针）AND 摘要：（随机 OR 对照 OR 临床 OR RCT） | 86 |

## Supplementary Table S3: Quality of the evidence based on GRADE.

| Certainty Assessment | | | | | | | No. of Patients | | Effect Size | Level of Certainty |
| --- | --- | --- | --- | --- | --- | --- | --- | --- | --- | --- |
| No. of Studies | Study Design | Risk Of Bias | Inconsistency | Indirectness | Imprecision | Publication Bias | Treatment Group | Control Group | Mean Difference (95% CI) |
| CAT | | | | | | | | | | |
| 4 | RCT | Very Serious a, b | Not Serious | Not Serious | Not Serious | Undetected | 127 | 125 | -3.25 (-3.73 to -2.78) | ⨁⨁**◯◯** Low |
| FEV1% | | | | | | | | | | |
| 6 | RCT | Serious a | Not Serious | Not Serious | Not Serious | Undetected | 216 | 215 | 1.83 (-0.17 to 3.83) | ⨁⨁⨁**◯** Moderate |
| FEV1/FVC | | | | | | | | | | |
| 5 | RCT | Serious a | Serious c | Not Serious | Not Serious | Undetected | 218 | 212 | 4.66 (2.21 to 7.12) | ⨁⨁**◯◯** Low |
| PaCO2 | | | | | | | | | | |
| 3 | RCT | Serious a | Serious c | Not Serious | Not Serious | Undetected | 99 | 98 | -1.85 (-2.74 to -0.95) | ⨁⨁⨁**◯** Moderate |
| PaO2 | | | | | | | | | | |
| 3 | RCT | Serious a | Not Serious | Not Serious | Not Serious | Undetected | 99 | 98 | 5.15 (1.22 to 9.07) | ⨁⨁**◯◯** Low |
| mMRC | | | | | | | | | | |
| 3 | RCT | Very Serious a, b | Serious c | Not Serious | Serious d | Undetected | 99 | 98 | 96.69 (-0.60 to 193.98) | ⨁**◯◯◯** Very Low |
| 6MWD | | | | | | | | | | |
| 2 | RCT | Serious a | Serious c | Not Serious | Serious d | Undetected | 91 | 91 | -5.70 (-11.97 to 0.58) | ⨁**◯◯◯** Very Low |
| Duration of Hospitalization | | | | | | | | | | |
| 3 | RCT | serious a | Serious c | Not serious | Not serious | undetected | 89 | 91 | -0.19 (-0.61 to 0.23) | ⨁⨁**◯◯** Low |

**a Some concern in randomization process, and selection of the reported results.**

**b High risk in deviations from intended interventions (not blinding participants).**

**c High heterogeneity.**

**d Wide 95% confidence intervals (CI).**

**Notes: CAT: COPD assessment test. FEV1: forced expiratory volume in one second. FVC: forced vital capacity. PaO2: partial pressure of oxygen. PaCO2: partial pressure of carbon dioxide. mMRC: modified British medical research council. HD: duration of hospitalization. 6MWD: 6-minute walking distance. RCT: randomized controlled trial.**


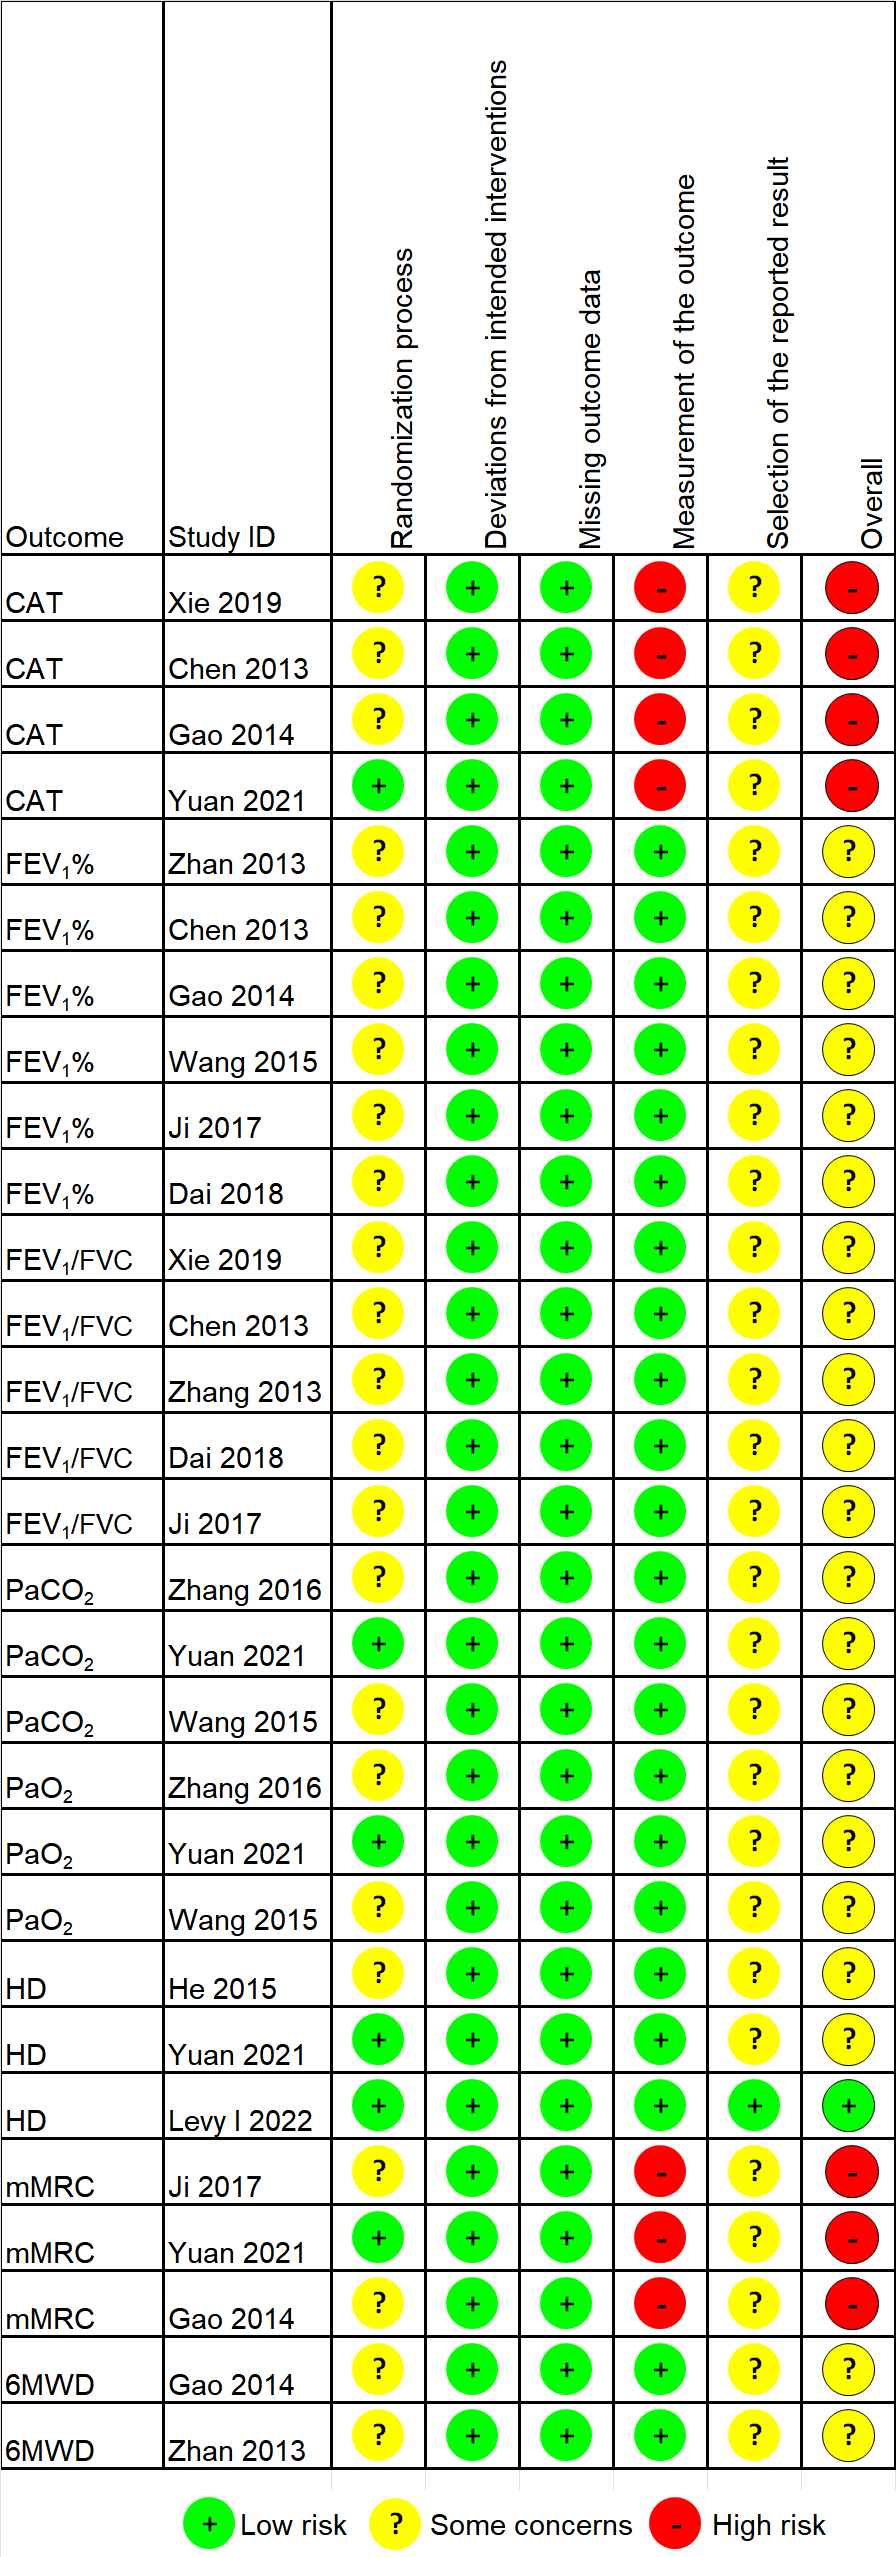


**Notes: CAT: COPD assessment test. FEV1: forced expiratory volume in one second. FVC: forced vital capacity. PaO2: partial pressure of oxygen. PaCO2: partial pressure of carbon dioxide. mMRC: modified British medical research council. HD: duration of hospitalization. 6MWD: 6-minute walking distance.**

## Supplementary Figure S1: Risk of bias graph for each outcome.


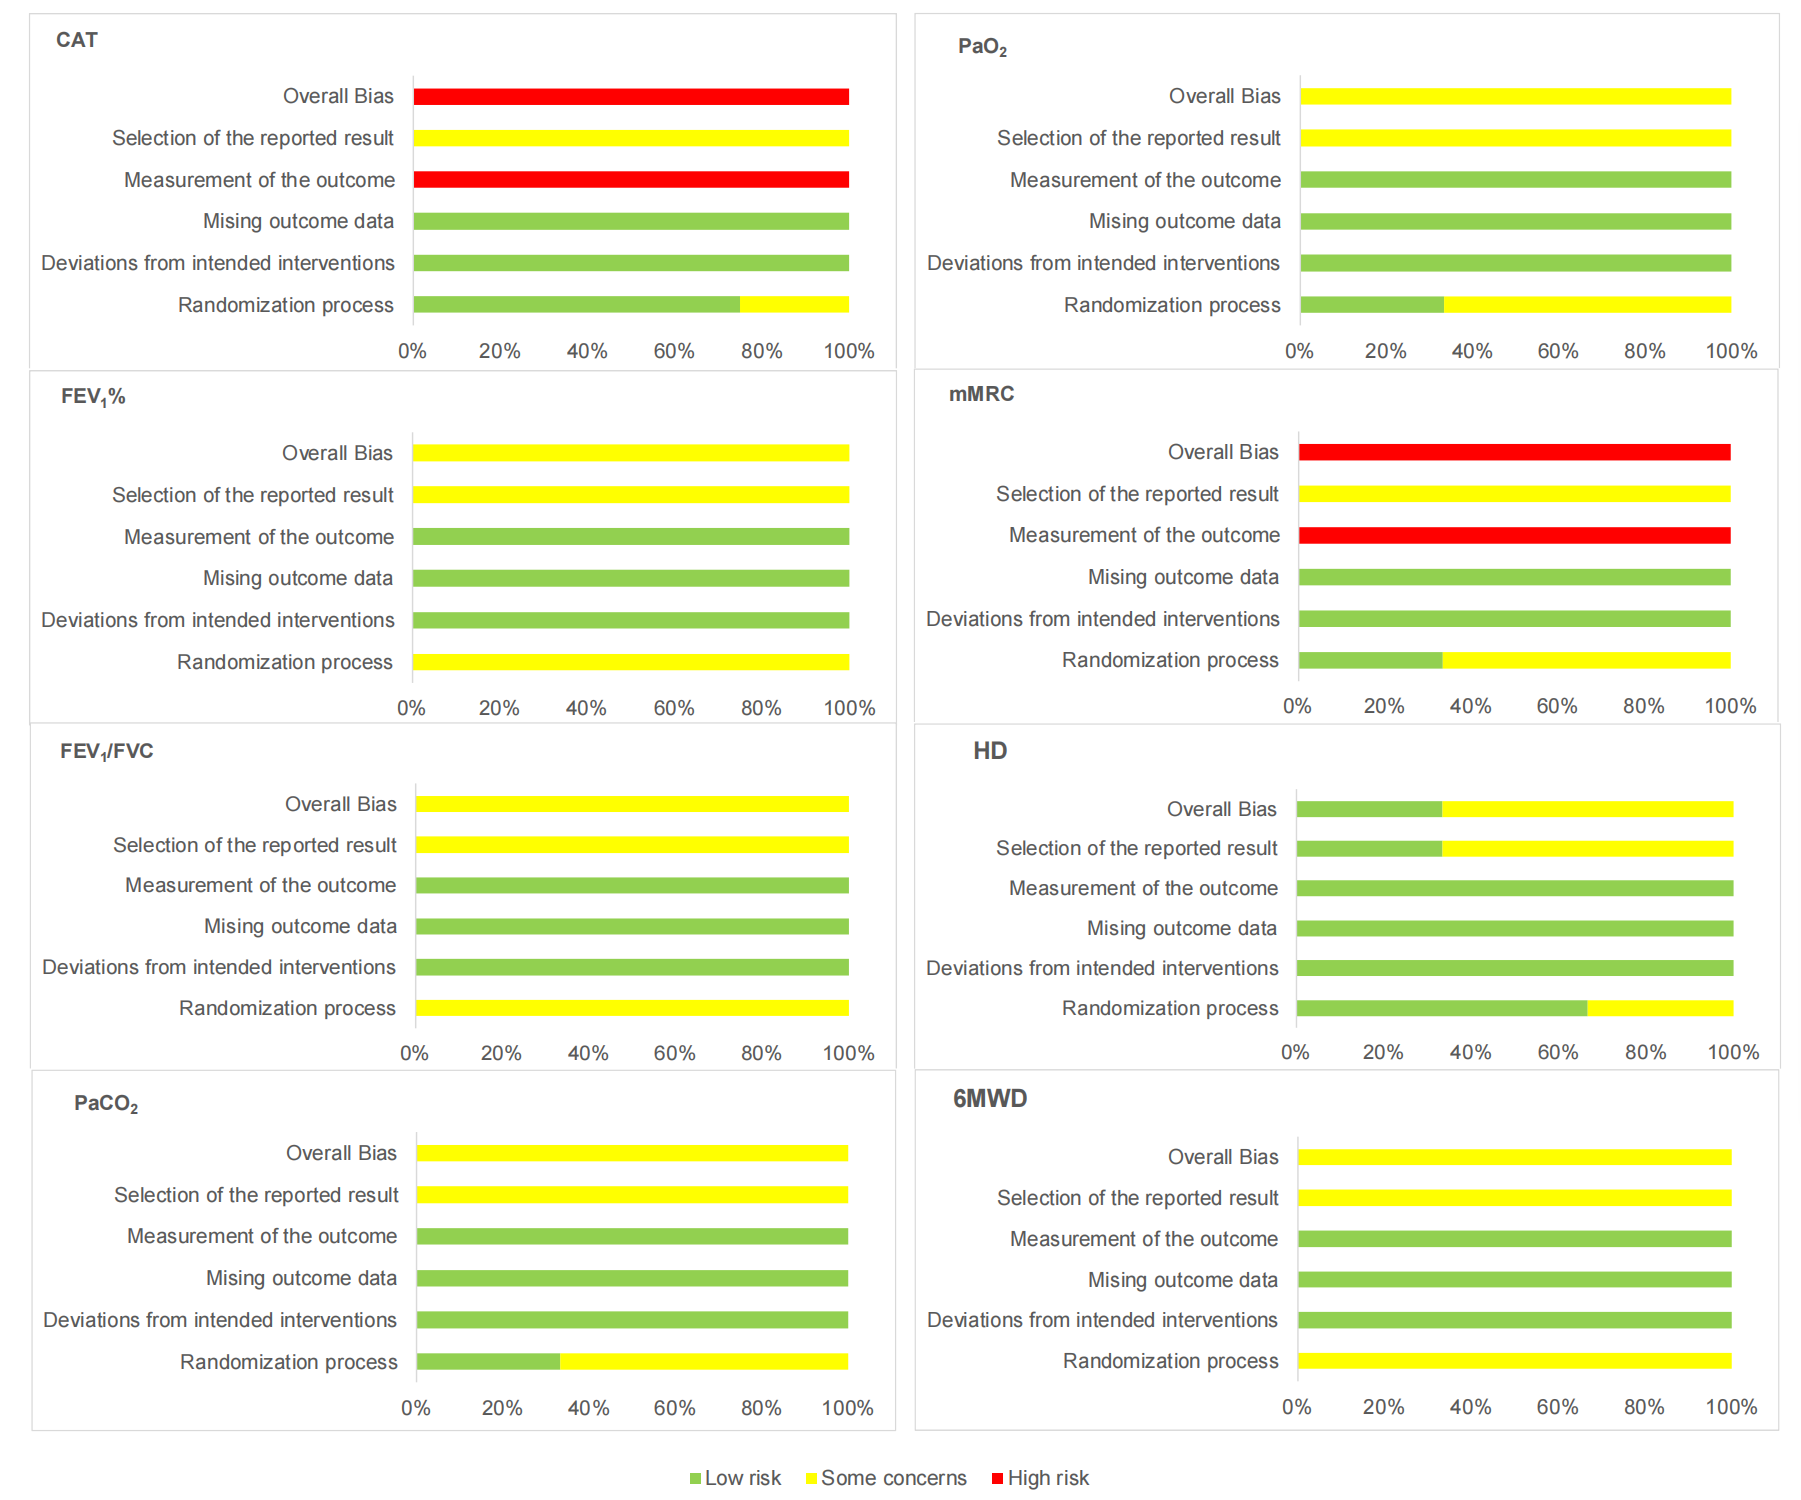


**Notes: CAT: COPD assessment test. FEV1: forced expiratory volume in one second. FVC: forced vital capacity. PaO2: partial pressure of oxygen. PaCO2: partial pressure of carbon dioxide. mMRC: modified British medical research council. HD: duration of hospitalization. 6MWD: 6-minute walking distance.**

## Supplementary Figure S2: Figure 3 Risk of bias summary for each outcome.


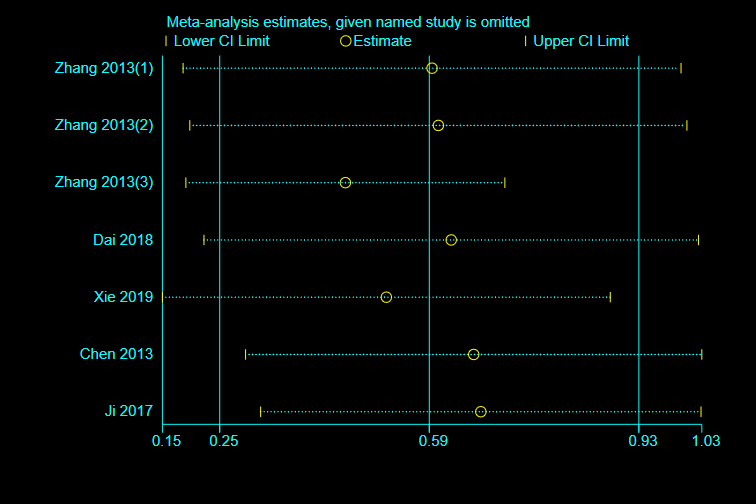


## Supplementary Figure S3: Sensitivity analysis for FEV1/FVC.


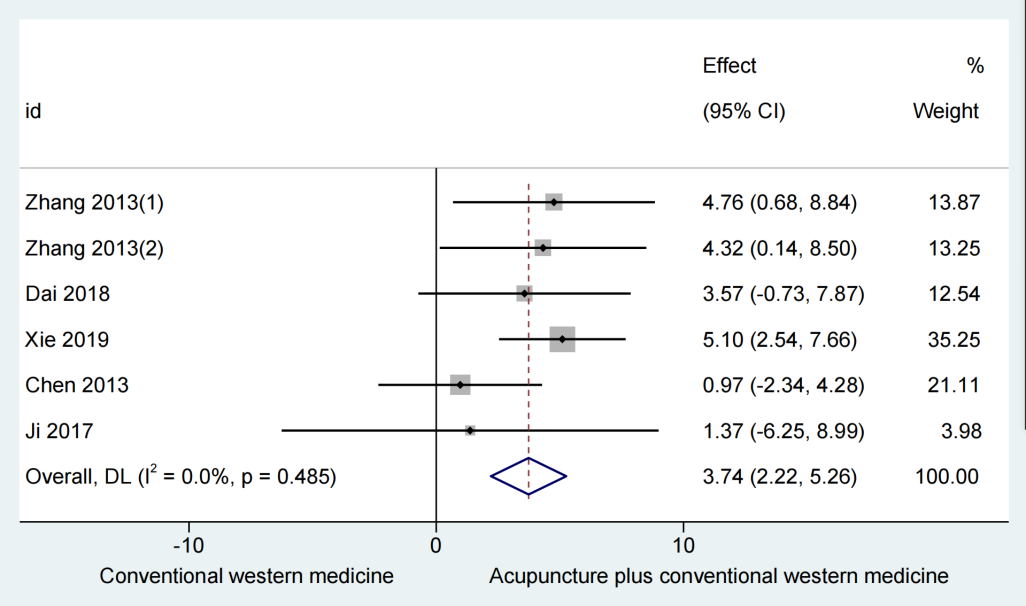


## Supplementary Figure S4: The updated forest plot for FEV1/FVC by removing the study that induced heterogeneity.


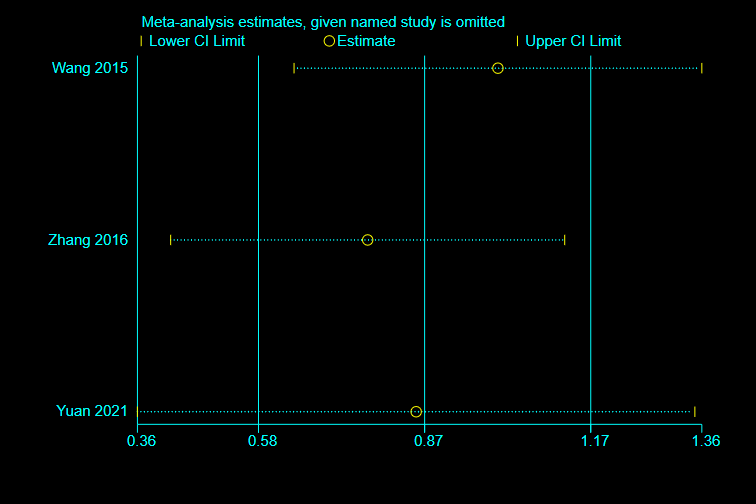


## Supplementary Figure S5: Sensitivity analysis for PaO2.


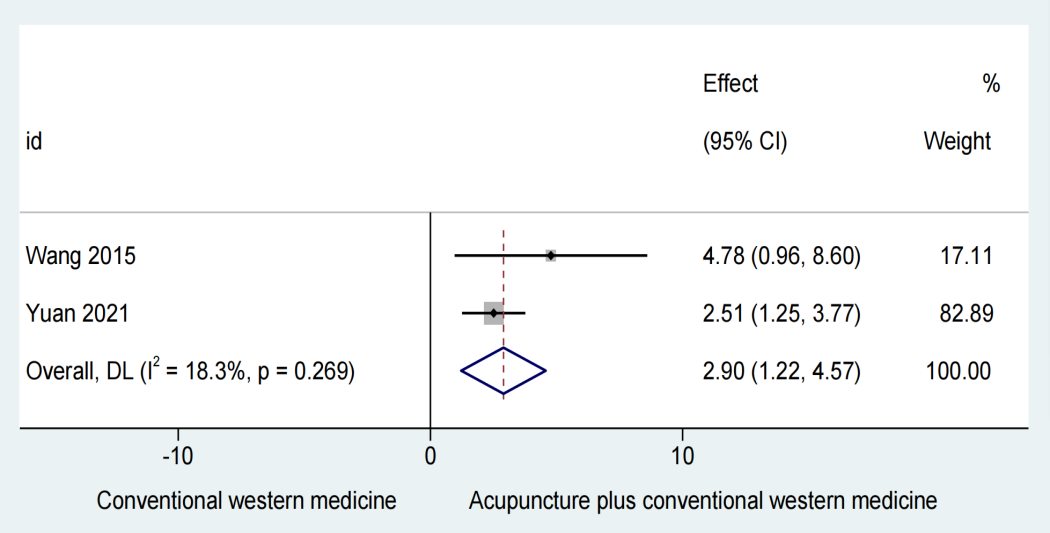


## Supplementary Figure S6: The updated forest plot for PaO2 by removing the study that induced heterogeneity.


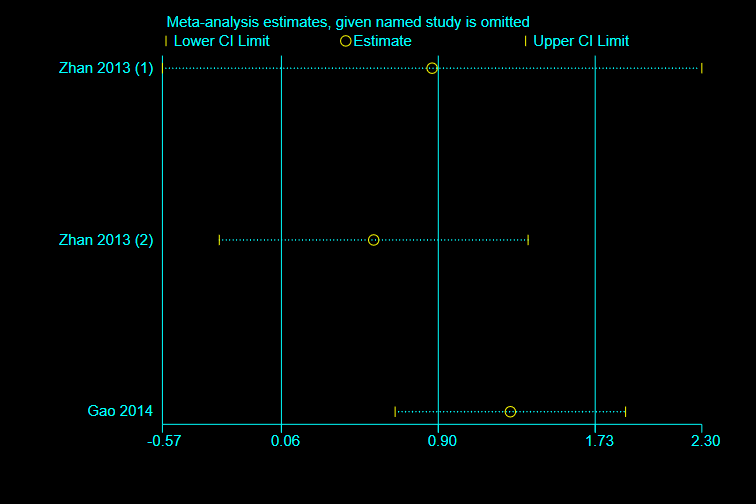


## Supplementary Figure S7: Sensitivity analysis for 6MWD.


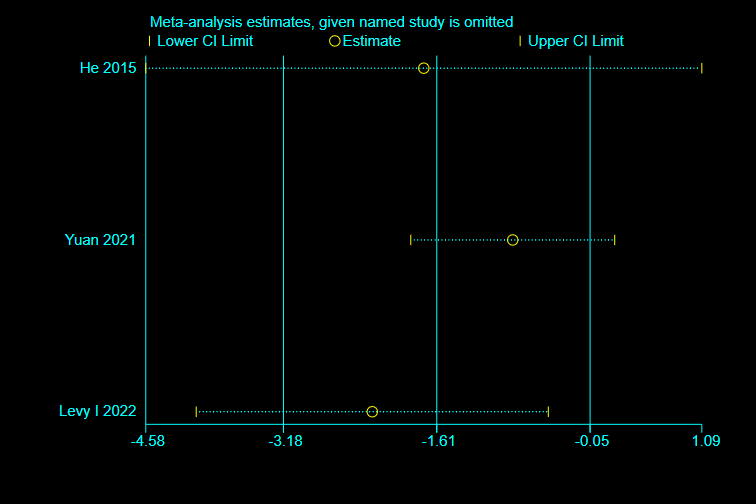


## Supplementary Figure S8: Sensitivity analysis for Duration of hospitalization.


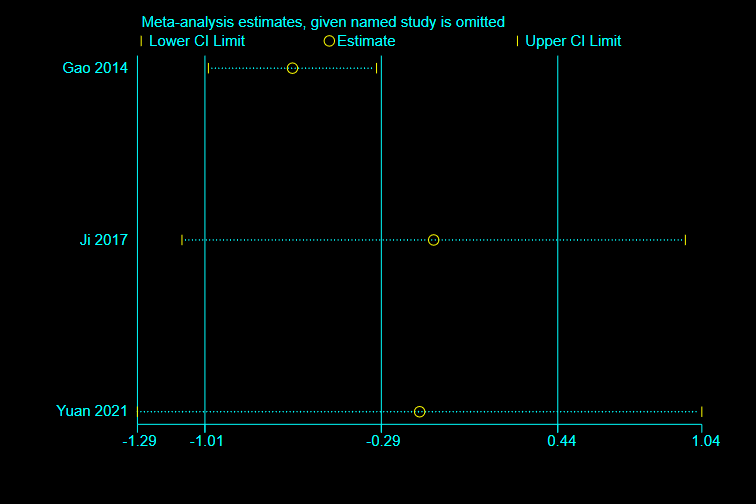


## Supplementary Figure S9: Sensitivity analysis for mMRC.
